# Supplementary material
Source: Springer Nature journal article supplement (https://www.springermedizin.de/resource/supplementary/12906_2001_9_MOESM10_ESM.pdf/9519328)

- CaCl<sub>2</sub>-Ca d Sulph - 30
- CaCl<sub>2</sub>-Alc - 30
- CaCl<sub>2</sub>-Ca d Sulph - 200
- CaCl<sub>2</sub>-Alc - 200

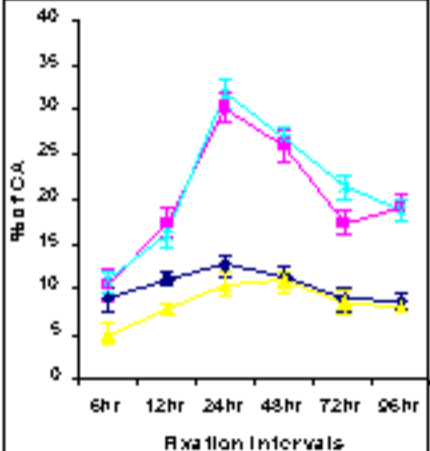

Supplement: MOESM10 [file 9519328]
